# Supplementary material for: Quantifying the effect of seasonal and vertical habitat tracking on planktonic foraminifera proxies
Source: Copernicus journal article supplement (doi:10.5194/cp-13-573-2017), 2017-06-06
Supplement: Supplementary file 1 [file cp-13-573-2017-supplement.zip]

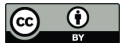

## *Supplement of*

# **Quantifying the effect of seasonal and vertical habitat tracking on planktonic foraminifera proxies**

**L. Jonkers and M. Kučera**

*Correspondence to:* Lukas Jonkers ([ljonkers@marum.de](mailto:ljonkers@marum.de))

- [cp-13-573-2017-supplement-title-page.pdf](#)
- [cp-2016-125-supplement-version2](#)
  - [WB05\\_summary.csv](#)

The copyright of individual parts of the supplement might differ from the CC BY 3.0 License.
